# Supplementary material
Source: publisher site journal article supplement (https://www.dovepress.com/article/322778)
Supplement: Supplementary file 1 [file get_supplementary_file.php]

# APPENDIX

# Appendix Table 1. STROBE Statement—Checklist of items that should be included in reports of *cross-sectional studies*

|  | Item No | Recommendation | Page No |
| --- | --- | --- | --- |
| **Title and abstract** | 1 | (*a*) Indicate the study’s design with a commonly used term in the title or the abstract | 2 |
| (*b*) Provide in the abstract an informative and balanced summary of what was done and what was found | 2 |
| Introduction | | | |
| Background/rationale | 2 | Explain the scientific background and rationale for the investigation being reported | 3 |
| Objectives | 3 | State specific objectives, including any prespecified hypotheses | 4 |
| Methods | | | |
| Study design | 4 | Present key elements of study design early in the paper | 4 |
| Setting | 5 | Describe the setting, locations, and relevant dates, including periods of recruitment, exposure, follow-up, and data collection | 4 |
| Participants | 6 | (*a*) Give the eligibility criteria, and the sources and methods of selection of participants | 4 |
| Variables | 7 | Clearly define all outcomes, exposures, predictors, potential confounders, and effect modifiers. Give diagnostic criteria, if applicable | 5 |
| Data sources/ measurement | 8* | For each variable of interest, give sources of data and details of methods of assessment (measurement). Describe comparability of assessment methods if there is more than one group | *5* |
| Bias | 9 | Describe any efforts to address potential sources of bias | 5 |
| Study size | 10 | Explain how the study size was arrived at | 5 |
| Quantitative variables | 11 | Explain how quantitative variables were handled in the analyses. If applicable, describe which groupings were chosen and why | 5 |
| Statistical methods | 12 | (*a*) Describe all statistical methods, including those used to control for confounding | 6 |
| (*b*) Describe any methods used to examine subgroups and interactions | 6 |
| (*c*) Explain how missing data were addressed |  |
| (*d*) If applicable, describe analytical methods taking account of sampling strategy |  |
| (*e*) Describe any sensitivity analyses |  |
| Results | | | |
| Participants | 13* | (a) Report numbers of individuals at each stage of study—eg numbers potentially eligible, examined for eligibility, confirmed eligible, included in the study, completing follow-up, and analysed | 7 |
| (b) Give reasons for non-participation at each stage | 7 |
| (c) Consider use of a flow diagram |  |
| Descriptive data | 14* | (a) Give characteristics of study participants (eg demographic, clinical, social) and information on exposures and potential confounders | 7 |
| (b) Indicate number of participants with missing data for each variable of interest | 7 |
| Outcome data | 15* | Report numbers of outcome events or summary measures | 8 |
| Main results | 16 | (*a*) Give unadjusted estimates and, if applicable, confounder-adjusted estimates and their precision (eg, 95% confidence interval). Make clear which confounders were adjusted for and why they were included | 8 |
| (*b*) Report category boundaries when continuous variables were categorized | 8 |
| (*c*) If relevant, consider translating estimates of relative risk into absolute risk for a meaningful time period | 8 |
| Other analyses | 17 | Report other analyses done—eg analyses of subgroups and interactions, and sensitivity analyses |  |
| Discussion | | | |
| Key results | 18 | Summarise key results with reference to study objectives | 9 |
| Limitations | 19 | Discuss limitations of the study, taking into account sources of potential bias or imprecision. Discuss both direction and magnitude of any potential bias | 11 |
| Interpretation | 20 | Give a cautious overall interpretation of results considering objectives, limitations, multiplicity of analyses, results from similar studies, and other relevant evidence | 10 |
| Generalisability | 21 | Discuss the generalisability (external validity) of the study results | 12 |
| Other information | | | |
| Funding | 22 | Give the source of funding and the role of the funders for the present study and, if applicable, for the original study on which the present article is based | 12 |
| *Give information separately for exposed and unexposed groups.  **Note:** An Explanation and Elaboration article discusses each checklist item and gives methodological background and published examples of transparent reporting. The STROBE checklist is best used in conjunction with this article (freely available on the Web sites of PLoS Medicine at http://www.plosmedicine.org/, Annals of Internal Medicine at http://www.annals.org/, and Epidemiology at http://www.epidem.com/). Information on the STROBE Initiative is available at [www.strobe-statement.org](http://www.strobe-statement.org). | | | |

# Appendix Table 2. Recruitment centers for the specified number of patients:

| **№** | **Recruitment centers** | **Setting** | **Number of patients** |
| --- | --- | --- | --- |
| 1. | National Centre of Cardiology and Internal Medicine | Bishkek | 87 |
| 2. | National Hospital | Bishkek | 80 |
| 3. | Town Clinical Hospital number 6 (Bishkek) | Bishkek | 42 |
| 4. | Osh Joint Regional Hospital | Osh | 70 |
| 5. | Jalal Abad Regional Hospital | Jalal Abad | 28 |

**Appendix** **Table 3.** Questionnaire for researcherfrom medical record data

| *Demographic* |  |
| --- | --- |
| Patient number |  |
| Name |  |
| Age |  |
| Gender |  |
| Region |  |
| Occupation |  |
| Having Insurance |  |
| Phone number |  |
| *Risk factors* |  |
| Cigarettes per day |  |
| Years start smoking |  |
| Year quit smoking |  |
| Years of smoking |  |
| Family history of COPD |  |
| Alcohol abuse |  |
| *Clinical variables* |  |
| COPD severity expressed in FEV1 (GOLD 1, 2, 3, 4)   - Liters - % predicted |  |
| **Complications**   - pulmonary hypertension - chronic respiratory failure - right ventricular failure   **Comorbidity**   - cardiovascular disease - asthma - allergic rhinitis - nasal polyps - bronchiectasis - osteoporosis - anxiety/depression - diabetes - TB - Gastritis - Pancreatitis - Prostate disease - Hyper/hypothyroiditis - lung cancer - Trauma - Other |  |
| *Treatment* |  |
| Respiratory medication (LABA, LAMA, etc) |  |
| Other medication |  |
| Other treatments (oxygen) |  |

**Appendix Table 4.** Questionnaire for patient

| *Demographic* |  |
| --- | --- |
| What is your age? | …years |
| Gender | Male/female |
| Length | Cm |
| Weight | Kg |
| Address | city/village/region |
| How long do you have to travel to the hospital? | …hours |
| What is your highest education? | None/Primary school/secondary school/professional/university |
| - Do you have children? - If yes, how many? - Do you have to take care of them currently? | Yes/no  Number of children  Yes/no |
| **Occupation**   - Do you currently have a job? - What kind of job? - Where you exposed to smoke or dust at work? | Yes/no/retired  Doctor/farmer/police man/nurse/…  Yes/no |
| Household Income per month | ….SOM |
| Do you have insurance? | Yes/no |
| Do you have a disability document? | Yes/no |
| *Risk factors* |  |
| - Do you have family members with COPD? - Do you have family members with lung cancer? - Do you have family members with TB? | Yes/no  Yes/no  Yes/no |
| Do you have family members that smoke? | Yes/no |
| - Did you ever smoke cigarettes? - At what age did you start? - How many cigarettes per day? - In case you quit, at what age did you quit? | Yes/no  At age ….years  ….cigarettes per day  At age….years |
| - Do you use electronic cigarettes? - How often? | Yes/no  ….days per week |
| - Do you use a waterpipe? - How often? | Yes/no  ….days per week |
| - Do you use biomass for cooking? - What kind of biomass you use for cooking? - In how many months? - How many hours per day? - Do you use biomass for heating? - What kind of biomass you use for heating? - In how many months? - How many hours per day? | Yes/no  Charcoal/wood/dung/other  …months  …hours  Yes/no  Charcoal/wood/dung/other  …months  …hours |
| *Clinical variables* |  |
| Did your doctor ever tell you that you have COPD? | Yes/no |
| Last week, were you experiencing any of these respiratory symptoms:  -chronic cough  -sputum production  -fatigue  -breathlessness  -chest tightness  -wheezing | Yes/no  Yes/no  Yes/no  Yes/no  Yes/no  Yes/no |
| - Do you have other diseases? - If yes, which ones? | Yes/no  Other diseases: TB, diabetes, for example |
| *Health care utilization* |  |
| - How many times did you visit a family doctor for your COPD in the last year? - Was it fully paid by the national health insurance? - If not, how much did you have to pay for your consultation with the family doctor yourself? (co-pay and/or unofficial payments) | …times  Yes/no  …COM |
| - How many times did you visit a pulmonologist for your COPD in the last year? - Was it fully paid by the national health insurance, when you had a reference from the family doctor? - If not, how much did you have to pay for your consultation yourself? (co-pay and/or unofficial payments) | …times  Yes/no  …COM |
| - How many times did the ambulance or family doctor were at your home because of COPD emergency (exacerbation)? - Was it fully paid by the national health insurance? - If not, how much did you have to pay yourself? (co-pay and/or unofficial payments) | …times  Yes/no  …COM |
| - How many days were you in the hospital-Intensive Care department for COPD in the last year? - Was it fully paid by the national health insurance? - If not, how much did you have to pay per hospital day yourself? (co-pay and/or unofficial payments) | …times  Yes/no  …COM |
| - How many days were you in the hospital-Pulmonology department for COPD in the last year? - Was it fully paid by the national health insurance? - If not, how much did you have to pay per hospital day yourself? (co-pay and/or unofficial payments) | …times  Yes/no  …COM |
| - Did you visit a private clinic for COPD last year? - If yes, how much did you pay to the private clinic? | …times  …COM |
| Last year, how many times were you in hospital for other reasons? | …times |
| Last year, were some of the diagnostics performed and if yes, how many times?   - spirometry - bronchoscopy - CT-scan - X-ray - ECG - Echo - Ultrasound - Was it fully covered by the health insurance? - If not, how much did you have to co-pay per visit? | Yes/no  Yes/no  Yes/no  Yes/no  Yes/no  Yes/no  Yes/no  Yes/no  …COM |
| *Quality of life* |  |
| CCQ | Complete separately |
| mMRC | Complete separately |
| *Treatment* |  |
| -Last year, did you use any respiratory medication?  -What medication, what dose and how often?   - SABA: salbutamol - SAMA: ipratropium - SABA/SAMA: Berudual - LAMA: Tiotropium - ICS/LABA: Seretide - ICS: beclomethasone - Xanthines: Theophylline, aminophylline - Mucolytics (acetulcystein, ambroxol) - Prednisolone - Antibiotics (specify which one) - Was medication fully covered by the health insurance? - If not, how much did you have to co-pay officially? - How much did you have to pay yourself for drugs in addition? | Yes/no  Example: Tiotropium 5 ug: 1 time 1 puff per day  Yes/no  …SOM  …SOM |
| Other treatments (oxygen, non-invasive ventilation)   - Was oxygen/non-invasive ventilation fully covered by the health insurance? - If not, how much did you have to co-pay officially? - How much did you have to pay non-officially? | Yes/no  …SOM  …SOM |
| Last year, did you receive a vaccination for   - influenza - pneumococcal | Yes/no  Yes/no |

**Appendix Table 5.** Population by the region and sample size for the study

| **Region** | **Adult population** | **Population** | **Center** | **Sample required** |
| --- | --- | --- | --- | --- |
| Batken | 311,600 | 464,300 | 1 (40%)  2 (40%)  4 (20%) | 24 |
| Jalal Abad | 730,000 | 1,087,900 | 1 (15%)  2 (15%)  4 (20%)  5 (50%) | 57 |
| Issyk Kul | 314,300 | 456,000 | 1 (50%)  2 (50%) | 24 |
| Naryn | 177,500 | 269,700 | 1 (65%)  2 (35%) | 14 |
| Osh | 786,800 | 1,186,600 | 1 (15%)  2 (15%)  4 (70%) | 61 |
| Talas | 156,100 | 241,400 | 1 (65%)  2 (35%) | 12 |
| Chui | 609,200 | 846,000 | 1 (33.3%)  2 (33.3%)  3 (33.3%) | 47 |
| Bishkek city | 677,400 | 905,100 | 1 (25%)  2 (25%)  3 (50%) | 52 |
| Osh city | 189,600 | 262,800 | 1 (15%)  2 (15%)  4 (70%) | 15 |
| TOTAL | 3,952,500 | 5,719,800 |  | 306 |

**Appendix Table 6.** The cost of diagnostics in Kyrgyz Health care centers.

| **Investigation** | **Kyrgyz SOM** | **USD ($)** |
| --- | --- | --- |
| Spirometry | 315 | 3.7 |
| Bronchoscopy | 360 | 4.3 |
| CT scan | 2000 | 23.8 |
| X-Ray | 200 | 2.4 |
| Electrocardiography (ECG) | 150 | 1.8 |
| Echocardiography | 200 | 2.4 |
| Ultrasound | 250 | 2.9 |

**Appendix Figure 1.** Recruitment sites and sample size per center

**
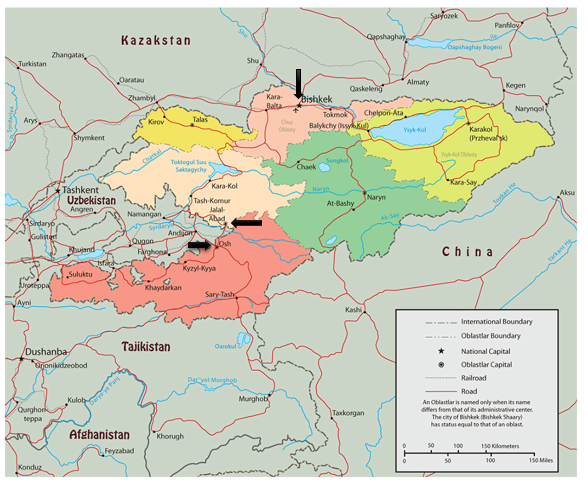
**
